# Supplementary material for: Antisense Oligonucleotides Promote Exon Inclusion and Correct the Common c.-32-13T>G GAA Splicing Variant in Pompe Disease
Source: PubMed Central journal article supplement — Mol Ther Nucleic Acids. 2017 Mar 14;7:90–100. doi: 10.1016/j.omtn.2017.03.001 (PMC5415969; doi:10.1016/j.omtn.2017.03.001), 2017-03-14
Supplement: mmc1.pdf [file mmc1.pdf]

OMTN, Volume 7

## Supplemental Information

**Antisense Oligonucleotides Promote Exon**

**Inclusion and Correct the Common c.-32-13T>G**

**GAA Splicing Variant in Pompe Disease**

**Erik van der Wal, Atze J. Bergsma, Joon M. Pijnenburg, Ans T. van der Ploeg, and W.W.M. Pim Pijnappel**

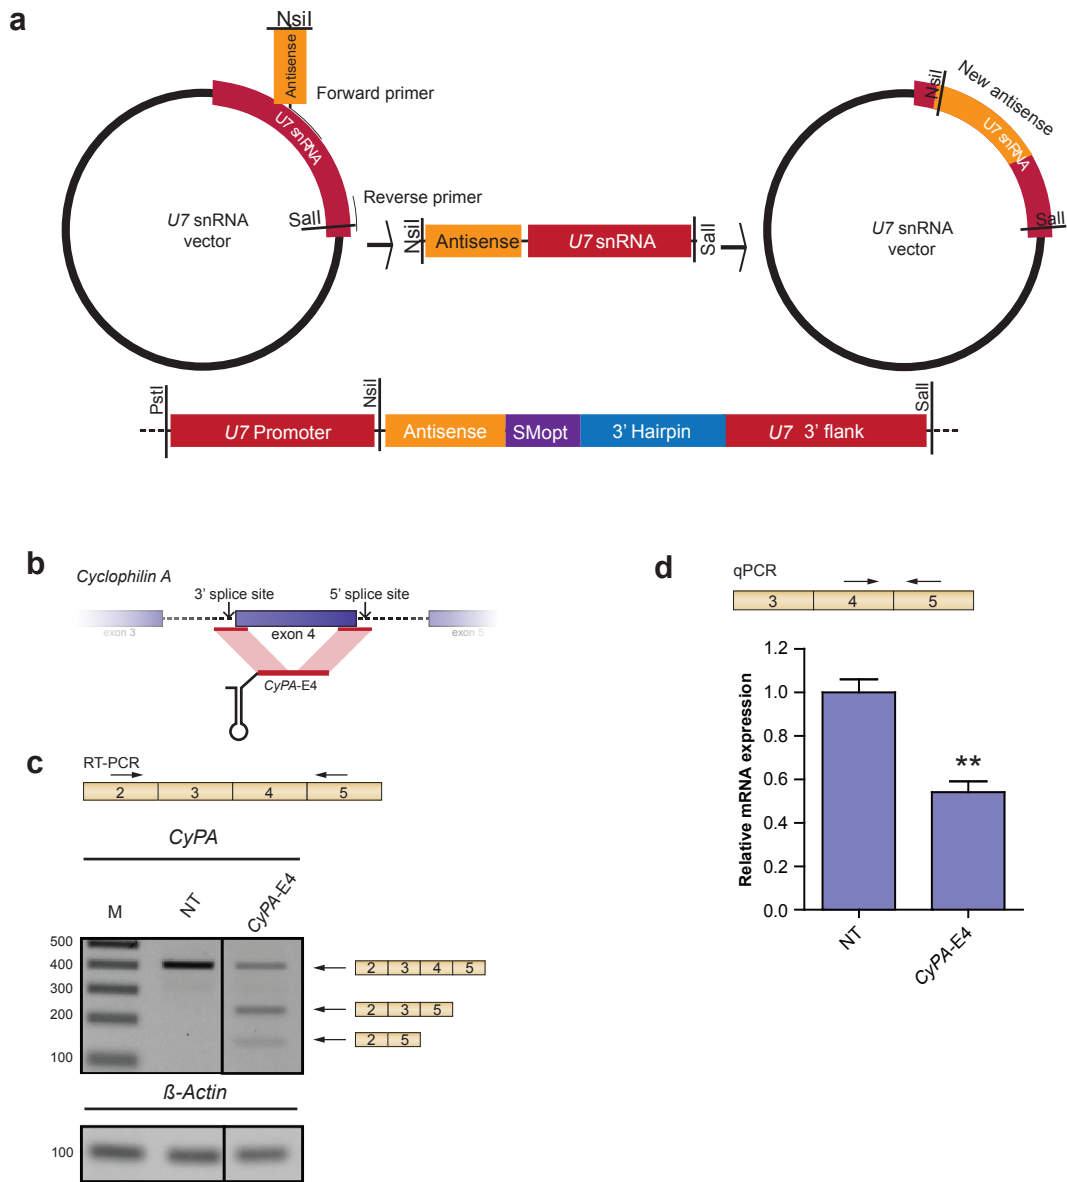

**Figure S1. One step U7 snRNA cloning system and validation. (a)** One-step cloning strategy for rapid cloning of AONs in the lentiviral U7 snRNA expression vector. A unique NsiI site was introduced in the U7 snRNA. AON sequences and the NsiI site were part of a forward primer in PCR, and a unique Sall site was included in the reverse PCR primer. **(b)** Cartoon of the region of the *Cyclophilin A* (*CypA*) gene that was targeted using a U7 snRNA-expressed AON (*CyPA-E4*) as described previously by Liu et al.<sup>1</sup> **(c)** RT-PCR analysis of patient 1 fibroblasts in which the *CypA* pre-mRNA was targeted using *CyPA-E4*. As control, non-transduced cells were used (NT). The PCR strategy is shown above the gel.  $\beta$ -Actin was used as loading control. **(d)** RT-qPCR analysis of the samples of **(c)**.

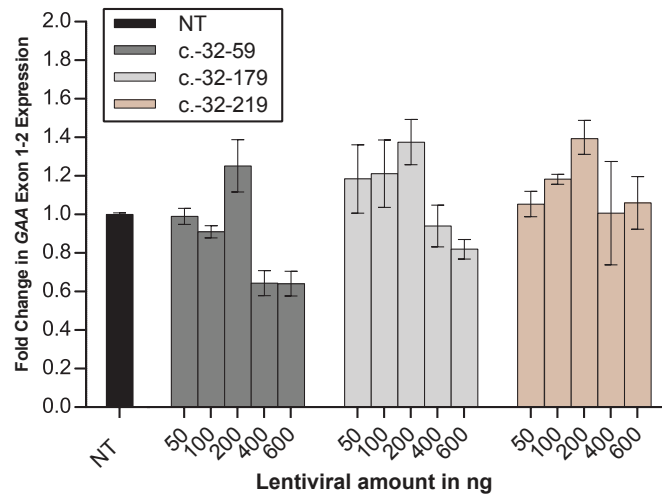

**Figure S2. Testing of the optimal viral amount for detection of splicing modulation sequences.** Patient 1 fibroblasts were infected with various lentiviruses at the amounts indicated. The optimum amount was determined to be 200 ng lentivirus per ml of medium. Data are means  $\pm$  SD of two biological replicates. Data points from 200 ng were taken from Figure 2B (N = 3). NT: non-transduced.

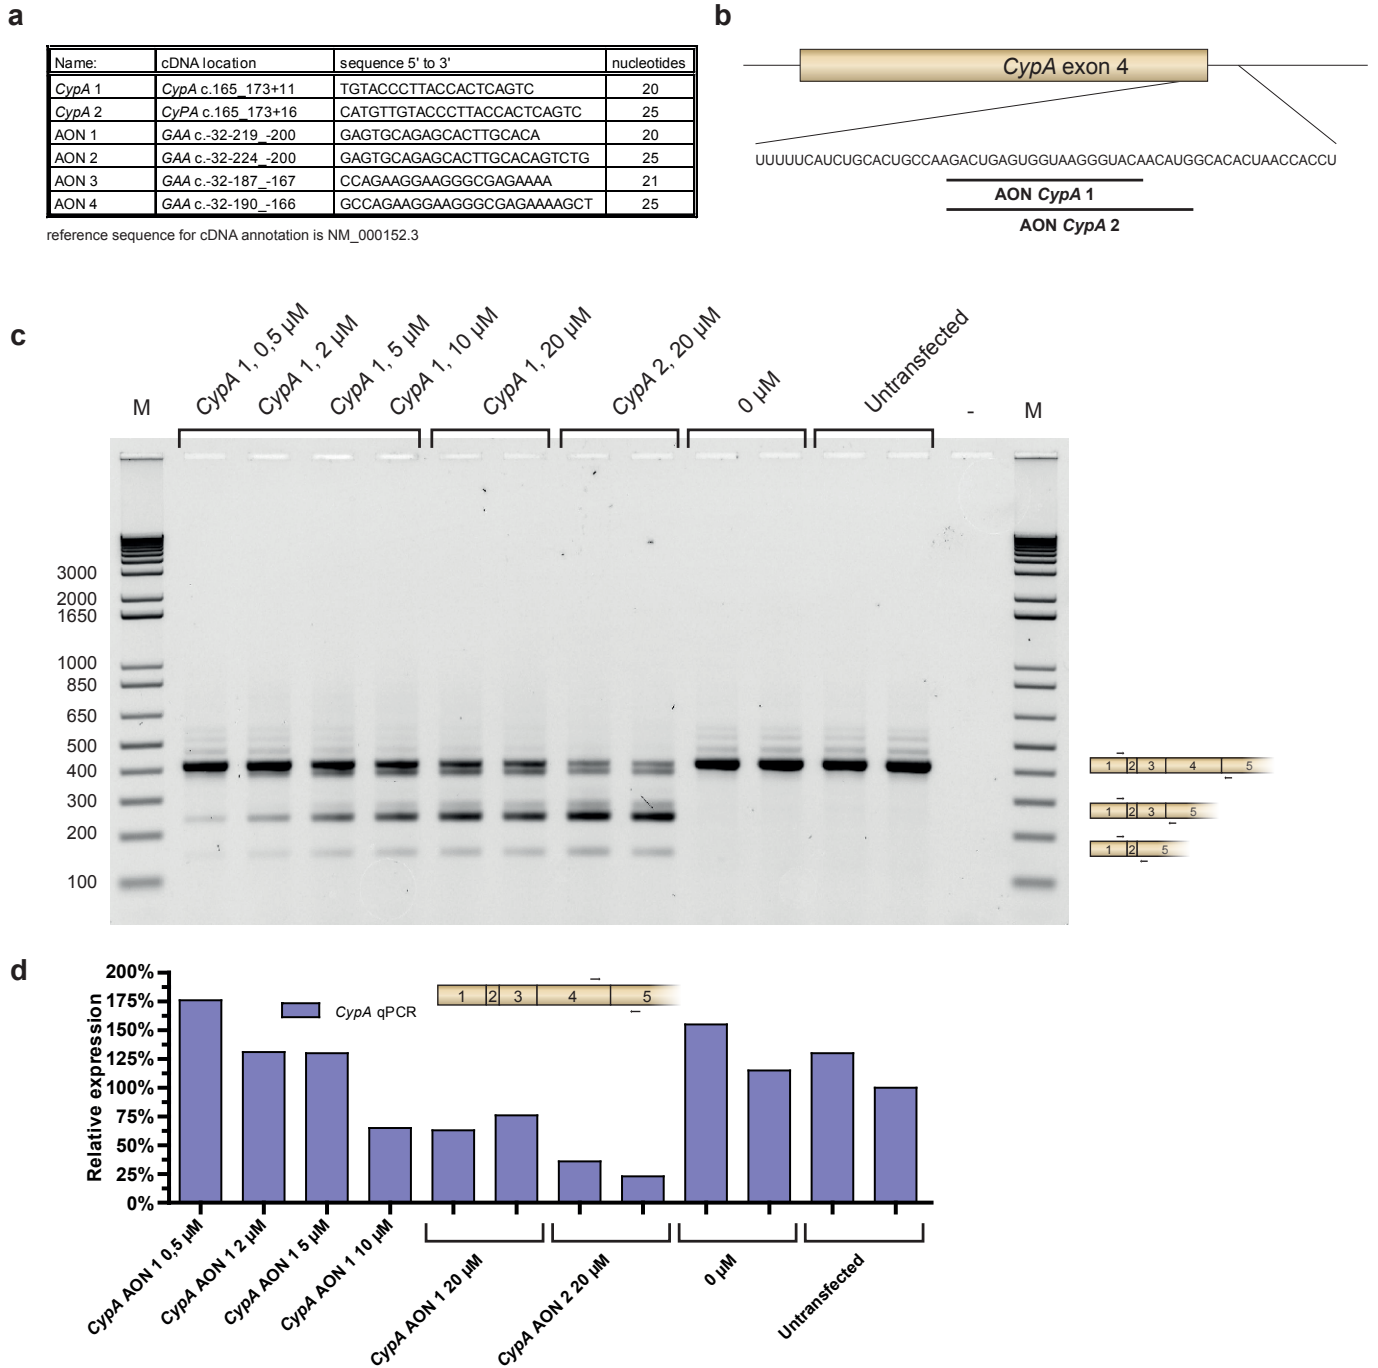

**Figure S3. Validation of PMO-based AONs in primary fibroblasts. (a)** Sequences of PMO-AONs used. **(b-d)** Test of PMO-based AONs on the positive control gene *CypA*. **(b)** Location of AONs designed to block the splice donor of *CypA* exon 4. **(c)** Fibroblasts from patient 1 were transfected with AONs at various concentrations as indicated, and *CypA* mRNAs were analyzed by RT-PCR. Cartoons at the right side of the gel indicate spliced products. **(d)** RT-qPCR analysis of exon 4 skipping of the experiment in **(c)**. The cartoon highlights the primer locations. Data represent means of 3 technical replicates.

**Table S1. Primers used for RT-qPCR, RT-PCR, cloning and sequencing**

| <b>Primer target</b>      | <b>Sequence (5'-3')</b>                | <b>Used for</b> |
|---------------------------|----------------------------------------|-----------------|
| $\beta$ -Actin fw         | AACCGCGAGAAGATGACCC                    | qPCR/RT-PCR     |
| $\beta$ -Actin rv         | GCCAGAGGCGTACAGGGATAG                  | qPCR/RT-PCR     |
| GAA Exon 1-2 fw           | AAACTGAGGCACGGAGCG                     | qPCR            |
| GAA Exon 1-2 rv           | GAGTGCAGCGGTTGCCAA                     | qPCR            |
| GAA Cryptic Exon 2 fw     | GGCACGGAGCGGGACA                       | qPCR            |
| GAA Cryptic Exon 2 rv     | CTGTTAGCTGGATCTTTGATCGTG               | qPCR            |
| GAA Full Skip Exon 2 fw   | AGGCACGGAGCGGATCA                      | qPCR            |
| GAA Full Skip Exon 2 rv   | TCGGAGAACTCCACGCTGTA                   | qPCR            |
| GAA Pseudo Exon fw        | AAACTGAGGCACGGAGCG                     | qPCR            |
| GAA Pseudo Exon rv        | GCAGCTCTGAGACATCAACCG                  | qPCR            |
| <i>CypA</i> Exon 2-5 fw   | CACCGTGTTCTTCGACATTG                   | RT-PCR          |
| <i>CypA</i> Exon 2-5 rv   | CCATGGCCTCCACAATATTC                   | RT-PCR          |
| <i>CypA</i> Exon 4-5 fw   | GGACCCAACACAAATGGTTC                   | qPCR            |
| <i>CypA</i> Exon 4-5 rv   | GGCCTCCACAATATTCATGC                   | qPCR            |
| Fw- <i>U7</i> snRNA-smOPT | GCTCTTTTAGAATTTTTGGAGCAGGTTTTCTGACTTCG | Cloning         |
| Rv- <i>U7</i> snRNA-smOPT | CGAAGTCAGAAAACCTGCTCCAAAAATTCTAAAAGAGC | Cloning         |
| Fw- <i>U7</i> snRNA-Nsil  | CCTGGCTCGCTACAGATGCATAGGAGGACGGAGGACG  | Cloning         |
| Rv- <i>U7</i> snRNA-Nsil  | CGTCCTCCGTCCCTCCTATGCATCTGTAGCGAGCCAGG | Cloning         |
| Fw- <i>U7</i> snRNA-PstI  | GCGCCTGCAGTAACAACATAGGAGCTGTG          | Cloning         |
| Rv- <i>U7</i> snRNA-Sall  | GCGCGTCGACCAGATACGCGTTTCCTAGGA         | Cloning         |
| M13 fw                    | GTAAAACGACGGCCAG                       | Sequencing      |
| M13 rv                    | CAGGAAACAGCTATGAC                      | Sequencing      |
| GAA Exon1-3 fw            | AGGTTCTCCTCGTCCGCCGTTGTTCA             | RT-PCR          |
| GAA Exon1-3 rv            | TCCAAGGGCACCTCGTAGCGCCTGTTA            | RT-PCR          |

## Supplemental References

1. Liu, S, Asparuhova, M, Brondani, V, Ziekau, I, Klimkait, T, and Schumperli, D (2004). Inhibition of HIV-1 multiplication by antisense U7 snRNAs and siRNAs targeting cyclophilin A. *Nucleic Acids Res* **32**: 3752-3759.
